# Supplementary material
Source: PubMed Central journal article supplement (PMC7868113)
Supplement: NIHMS1645172-supplement-Supplemental_Digital_Content_2.pdf [file NIHMS1645172-supplement-Supplemental_Digital_Content_2.pdf]

## Supplemental Digital Content 2

### Emergency Medicine Resident Educational Intervention Pre- and Post- Surveys

#### Likert-type Scale Questions:

1. I am aware of the specific elements of the history to obtain from sexual assault patients.

Strongly Disagree    Disagree    Neutral    Agree    Strongly Agree

2. I feel comfortable counseling patients about the sexual assault forensic exam.

Strongly Disagree    Disagree    Neutral    Agree    Strongly Agree

3. I am confident in my ability to avoid re-traumatizing sexual assault patients through my words and actions.

Strongly Disagree    Disagree    Neutral    Agree    Strongly Agree

4. I feel comfortable conducting a sexual assault forensic exam using an Illinois State Police Evidence Collection Kit (ISPECK).

Strongly Disagree    Disagree    Neutral    Agree    Strongly Agree

5. I feel comfortable with performing an ano-genital exam for a sexual assault patient.

Strongly Disagree    Disagree    Neutral    Agree    Strongly Agree

6. I am comfortable counseling sexual assault patients about what will happen to their ISPECK after completion.

Strongly Disagree    Disagree    Neutral    Agree    Strongly Agree

7. I feel comfortable answering a sexual assault patient's questions regarding payment for the emergency department visit.

Strongly Disagree    Disagree    Neutral    Agree    Strongly Agree

8. I am aware of my hospital's policies and procedures regarding cases of sexual assault.

Strongly Disagree    Disagree    Neutral    Agree    Strongly Agree

9. Sexual assault cases in the emergency department take time away from more critical patients.

Strongly Disagree      Disagree      Neutral      Agree      Strongly Agree

10. I have the time to conduct a sexual assault forensic exam in a thorough and sensitive manner.

Strongly Disagree      Disagree      Neutral      Agree      Strongly Agree

11. I think that physicians should be specifically trained to care for sexual assault patients.

Strongly Disagree      Disagree      Neutral      Agree      Strongly Agree

**Pre-Survey Short-answer Questions:**

1. What are the main systemic and personal barriers you face to treating sexual assault patients?
2. What are your educational gaps about sexual assault patients?

**Post-Survey Short-answer Question:**

1. Please provide us with any feedback you have about this experience.
