# Supplementary material
Source: PubMed Central journal article supplement (PMC7868113)
Supplement: NIHMS1645172-supplement-Supplemental_Digital_Content_3.pdf [file NIHMS1645172-supplement-Supplemental_Digital_Content_3.pdf]

### Supplemental Digital Content 3

#### Supplemental Figure

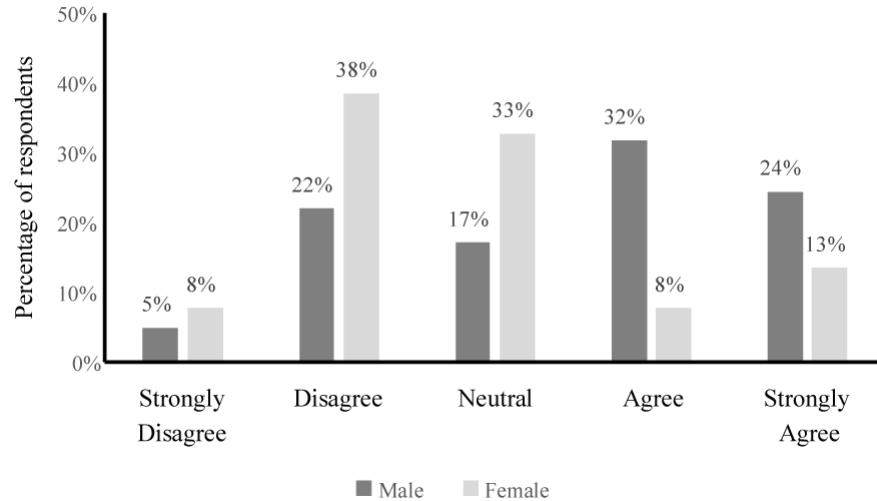

Supplemental Figure: Comparison of responses by gender to the needs-assessment survey question “sexual assault cases in the emergency department take time away from more critical patients,”  $p < 0.01$

The statistical significance of the difference between the group distributions was determined using the Wilcoxon Rank-Sum test. Statistical significance was set a priori as a two-tailed  $p$ -value of  $< 0.05$ .
